# Supplementary material
Source: ML conference proceedings conference paper supplement (https://openaccess.thecvf.com/content/ACCV2020/html/Lei_An_Efficient_Group_ACCV_2020_paper.html)
Supplement: Supplementary file 2 [file Lei_An_Efficient_Group_ACCV_2020_supplemental.zip]

## 1 Supplementary Material

The following items are contained in the supplementary material:

1. The comparison of GFFRN10-L with CARN when scaling factor is  $\times 4$ .
2. The comparison of GFFRN40 with the most state-of-the-art methods.
3. More qualitative results.

### 1.1 GFFRN-L vs. CARN

In our paper, GFFRN-L outperforms CARN under the scaling factors of  $\times 2$  and  $\times 3$ . However, when the scaling factor becomes larger ( $\times 4$ ), GFFRN-L does not have a similar advantage over CARN. For a fair comparison, we increase the number of GFFRB from 6 to 10 in order to make GFFRN-L have the same number of Multi-Adds with CARN. The comparison is shown in table 1. GFFRN-L outperforms outperforms CARN when scaling factor is  $\times 4$ .

**Table 1.** Quantitative comparisons of GFFRN10-L and CARN when scaling factor is  $\times 4$ . Red represents the best result.

| Scale | Model     | Params | Multi-Adds | Set5                | Set14               | B100                | Urban100            | Manga109            |
|-------|-----------|--------|------------|---------------------|---------------------|---------------------|---------------------|---------------------|
| 4     | CARN      | 1.59M  | 91G        | 32.13/0.8937        | 28.60/0.7806        | 27.58/0.7349        | 26.07/0.7837        | -/-                 |
|       | GFFRN10-L | 1.53M  | 88G        | <b>32.18/0.8950</b> | <b>28.64/0.7821</b> | <b>27.60/0.7364</b> | <b>26.12/0.7872</b> | <b>30.50/0.9080</b> |

### 1.2 GFFRN40 vs. EDSR and RDN

In our paper, we mainly focus on efficient and lightweight models. We designed a GFFRN (about 5M parameters) and a lightweight GFFRN-L (less than 1M parameters) to demonstrate the efficiency of the proposed GFFRB. Here we increase the number of GFFRB to further improve the performance of GFFRN. In this experiment, the number of the GFFRB  $D$  is set to 40, channel expansion factor  $e$  is set to 4, base channel number  $m$  is set to 64 and we denote this model as GFFRN40. Note that all the GFFRBs in GFFRN40 are simply stacked like EDSR. In table 2, we compare our GFFRN with the most state-of-the-art methods EDSR and RDN. We can find that even with fewer parameters and computations, our GFFRN achieves a comparable result compared with the two methods. This fully demonstrates that the proposed GFFRB are more efficient than RB and RDB. Some visual results of these methods are shown in Figure 5-8.

### 1.3 More Qualitative Results

In Figure 1-8, we provide more visual results of different methods.

**Table 2.** Quantitative comparisons of state-of-the-art methods. Red represents the best result.

| Scale | Model   | Params       | Multi-Adds   | Set5                | Set14               | B100                | Urban100            | Manga109            |
|-------|---------|--------------|--------------|---------------------|---------------------|---------------------|---------------------|---------------------|
| 2     | EDSR    | 40.7M        | 9390G        | 38.11/0.9601        | 33.92/0.9195        | 32.32/0.9013        | <b>32.93/0.9351</b> | -                   |
|       | RDN     | 22.1M        | 5096G        | <b>38.24/0.9614</b> | 34.01/0.9212        | <b>32.34/0.9017</b> | 32.89/0.9353        | 39.18/0.9780        |
|       | GFFRN40 | <b>17.1M</b> | <b>3940G</b> | 38.19/0.9611        | <b>34.03/0.9211</b> | <b>32.34/0.9017</b> | 32.92/0.9356        | <b>39.21/0.9782</b> |
| 3     | EDSR    | 43.7M        | 4470G        | 34.65/0.9282        | 30.52/0.8462        | 29.25/0.8093        | 28.80/0.8653        | -/-                 |
|       | RDN     | 22.3M        | 2285G        | 34.71/0.9296        | <b>30.57/0.8468</b> | <b>29.26/0.8093</b> | 28.80/0.8653        | 34.13/0.9484        |
|       | GFFRN40 | <b>17.3M</b> | <b>1768G</b> | <b>34.74/0.9296</b> | 30.55/0.8467        | 29.25/0.8094        | <b>28.81/0.8661</b> | <b>34.14/0.9484</b> |
| 4     | EDSR    | 43.1M        | 2900G        | 32.46/0.8968        | 28.80/0.7876        | 27.71/0.7420        | <b>26.64/0.8033</b> | -/-                 |
|       | RDN     | 22.6M        | 1301G        | 32.47/0.8990        | <b>28.81/0.7871</b> | <b>27.72/0.7419</b> | 26.61/0.8028        | 31.00/0.9151        |
|       | GFFRN40 | <b>17.2M</b> | <b>1020G</b> | <b>32.52/0.8989</b> | 28.79/0.7873        | 27.71/0.7414        | 26.60/0.8026        | <b>31.03/0.9157</b> |

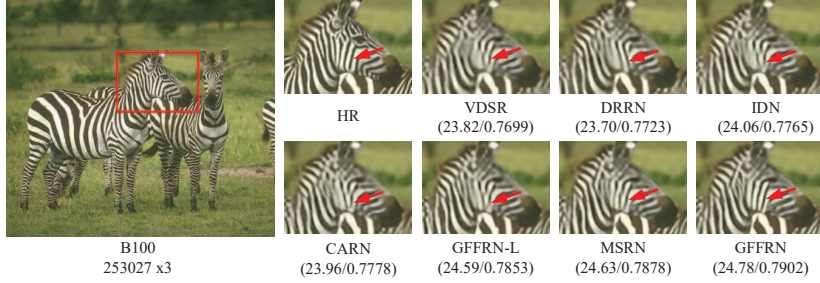

**Fig. 1.** Visual comparison of different methods on image "253027".

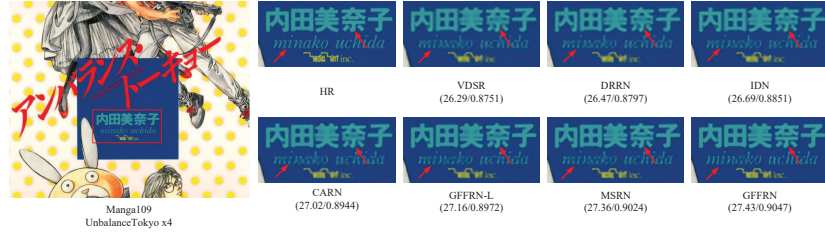

**Fig. 2.** Visual comparison of different methods on image "UnbalanceTokyo".

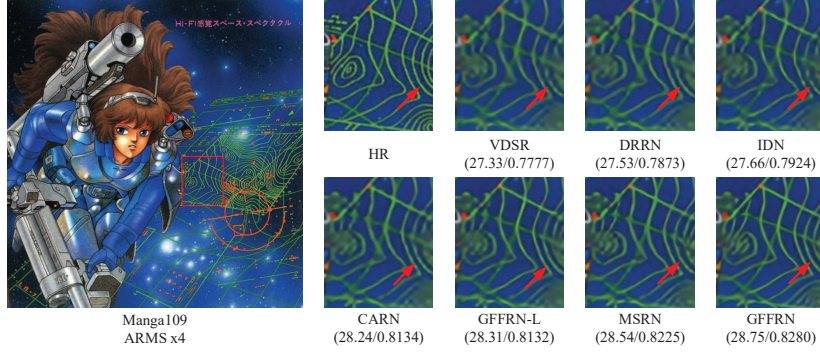

**Fig. 3.** Visual comparison of different methods on image "ARMS".

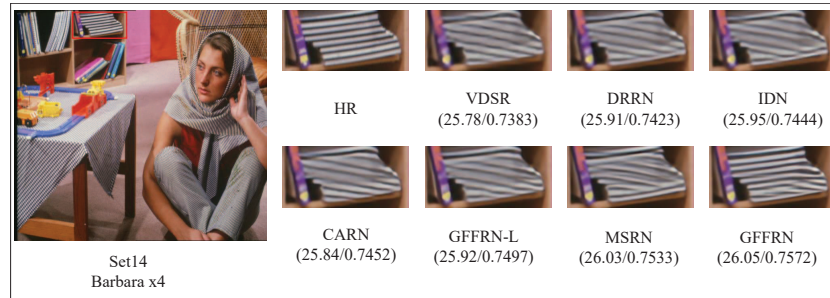

**Fig. 4.** Visual comparison of different methods on image "Barbara".

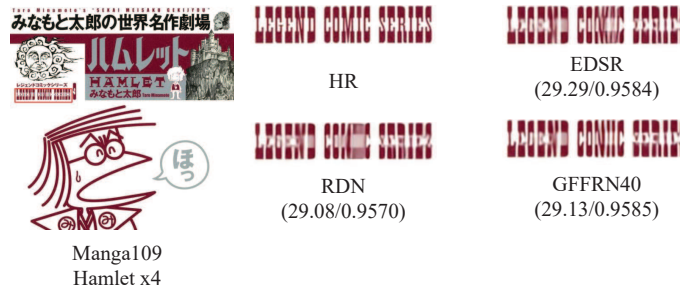

**Fig. 5.** Visual comparison of different methods on image "Hamlet".

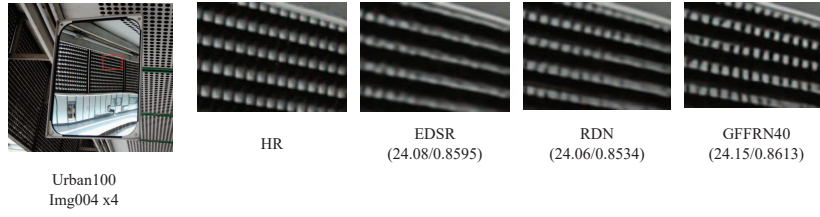

**Fig. 6.** Visual comparison of different methods on image "img004".

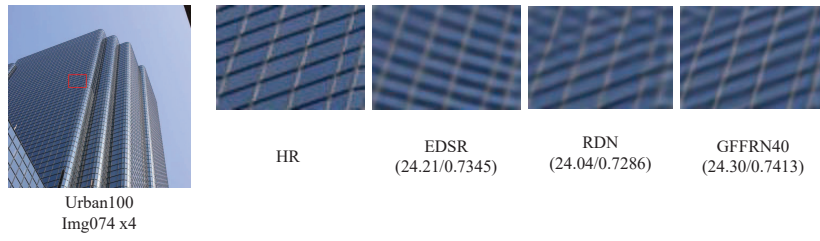

**Fig. 7.** Visual comparison of different methods on image "img074".

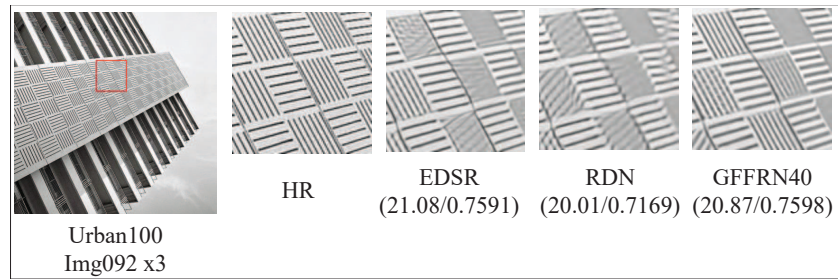

**Fig. 8.** Visual comparison of different methods on image "img092".
