# Supplementary material
Source: ML conference proceedings conference paper supplement (https://openaccess.thecvf.com/content/ACCV2020/html/Lei_An_Efficient_Group_ACCV_2020_paper.html)
Supplement: Supplementary file 5 [file Lei_An_Efficient_Group_ACCV_2020_supplemental.zip]

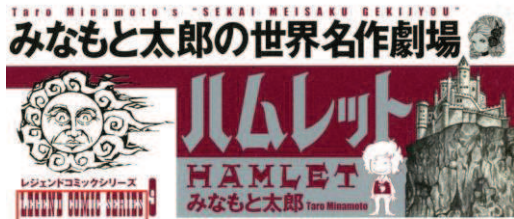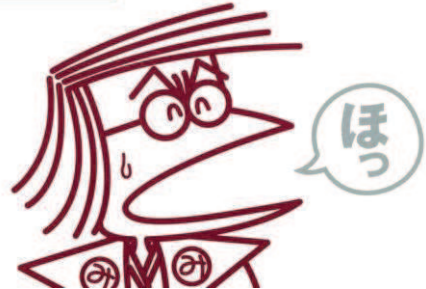

Manga109  
Hamlet x4

LEGEND COMIC SERIES

HR

LEGEND COMIC SERIES

RDN  
(29.08/0.9570)

LEGEND COMIC SERIES

EDSR  
(29.29/0.9584)

LEGEND COMIC SERIES

GFFRN40  
(29.13/0.9585)
