# Supplementary material
Source: ML conference proceedings conference paper supplement (https://openaccess.thecvf.com/content/ACCV2020/html/Lei_An_Efficient_Group_ACCV_2020_paper.html)
Supplement: Supplementary file 10 [file Lei_An_Efficient_Group_ACCV_2020_supplemental.zip]

Archive with 38 entries (36 files):
- 0622-supp/
- 0622-supp/accv2020submission.aux
- 0622-supp/accv2020submission.bbl
- 0622-supp/accv2020submission.blg
- 0622-supp/accv2020submission.log
- 0622-supp/accv2020submission.pdf
- 0622-supp/accv2020submission.synctex.gz
- 0622-supp/accv2020submission.tex
- 0622-supp/accv2020submission.tex.bak
- 0622-supp/accv2020submission.tex.sav
- 0622-supp/cvpr_eso.sty
- 0622-supp/egbib.bib
- 0622-supp/eso-pic.sty
- 0622-supp/figs/
- 0622-supp/figs/253027-eps-converted-to.pdf
- 0622-supp/figs/253027.eps
- 0622-supp/figs/ARMS-eps-converted-to.pdf
- 0622-supp/figs/ARMS.eps
- 0622-supp/figs/Barbara-eps-converted-to.pdf
- 0622-supp/figs/Barbara.eps
- 0622-supp/figs/CARN-eps-converted-to.pdf
- 0622-supp/figs/CARN.eps
- 0622-supp/figs/CARN1.eps
- 0622-supp/figs/hamlet-eps-converted-to.pdf
- 0622-supp/figs/hamlet.eps
- 0622-supp/figs/img004-eps-converted-to.pdf
- 0622-supp/figs/img004.eps
- 0622-supp/figs/img074-eps-converted-to.pdf
- 0622-supp/figs/img074.eps
- 0622-supp/figs/img092-eps-converted-to.pdf
- 0622-supp/figs/img092.eps
- 0622-supp/figs/skipconnection-eps-converted-to.pdf
- 0622-supp/figs/skipconnection.eps
- 0622-supp/figs/UnbalanceTokyo-eps-converted-to.pdf
- 0622-supp/figs/UnbalanceTokyo.eps
- 0622-supp/llncs.cls
- 0622-supp/ruler.sty
- 0622-supp/splncs.bst
