# Supplementary material
Source: ML conference proceedings conference paper supplement (https://openaccess.thecvf.com/content/ACCV2020/html/Lei_An_Efficient_Group_ACCV_2020_paper.html)
Supplement: Supplementary file 10 [file Lei_An_Efficient_Group_ACCV_2020_supplemental.zip › 0622-supp/accv2020submission.aux]

\relax 
\@writefile{toc}{\contentsline {section}{\numberline {1}Supplementary Material}{1}}
\@writefile{toc}{\contentsline {subsection}{\numberline {1.1}GFFRN-L vs. CARN}{1}}
\@writefile{lot}{\contentsline {table}{\numberline {1}{\ignorespaces Quantitative comparisons of GFFRN10-L and CARN when scaling factor is $\times 4$. Red represents the best result.}}{1}}
\newlabel{GFFRNL}{{1}{1}}
\newlabel{table:CARN}{{1}{1}}
\@writefile{toc}{\contentsline {subsection}{\numberline {1.2}GFFRN40 vs. EDSR and RDN}{1}}
\@writefile{toc}{\contentsline {subsection}{\numberline {1.3}More Qualitative Results}{1}}
\@writefile{lot}{\contentsline {table}{\numberline {2}{\ignorespaces Quantitative comparisons of state-of-the-art methods. Red represents the best result.}}{2}}
\newlabel{largemodel}{{2}{2}}
\@writefile{lof}{\contentsline {figure}{\numberline {1}{\ignorespaces Visual comparison of different methods on image "253027".}}{2}}
\newlabel{253027}{{1}{2}}
\@writefile{lof}{\contentsline {figure}{\numberline {2}{\ignorespaces Visual comparison of different methods on image "UnbalanceTokyo".}}{2}}
\newlabel{UnbalanceTokyo}{{2}{2}}
\@writefile{lof}{\contentsline {figure}{\numberline {3}{\ignorespaces Visual comparison of different methods on image "ARMS".}}{3}}
\newlabel{ARMS}{{3}{3}}
\@writefile{lof}{\contentsline {figure}{\numberline {4}{\ignorespaces Visual comparison of different methods on image "Barbara".}}{3}}
\newlabel{Barbara}{{4}{3}}
\@writefile{lof}{\contentsline {figure}{\numberline {5}{\ignorespaces Visual comparison of different methods on image "Hamlet".}}{3}}
\newlabel{Barbara}{{5}{3}}
\@writefile{lof}{\contentsline {figure}{\numberline {6}{\ignorespaces Visual comparison of different methods on image "img004".}}{4}}
\newlabel{Barbara}{{6}{4}}
\@writefile{lof}{\contentsline {figure}{\numberline {7}{\ignorespaces Visual comparison of different methods on image "img074".}}{4}}
\newlabel{Barbara}{{7}{4}}
\@writefile{lof}{\contentsline {figure}{\numberline {8}{\ignorespaces Visual comparison of different methods on image "img092".}}{4}}
\newlabel{Barbara}{{8}{4}}
