# Supplementary material
Source: ML conference proceedings conference paper supplement (https://openaccess.thecvf.com/content/ACCV2020/html/Lei_An_Efficient_Group_ACCV_2020_paper.html)
Supplement: Supplementary file 10 [file Lei_An_Efficient_Group_ACCV_2020_supplemental.zip › 0622-supp/accv2020submission.blg]

This is BibTeX, Version 0.99dThe top-level auxiliary file: accv2020submission.aux
I found no \citation commands---while reading file accv2020submission.aux
I found no \bibdata command---while reading file accv2020submission.aux
I found no \bibstyle command---while reading file accv2020submission.aux
(There were 3 error messages)
