# Supplementary material
Source: ML conference proceedings conference paper supplement (https://openaccess.thecvf.com/content/ACCV2020/html/Lei_An_Efficient_Group_ACCV_2020_paper.html)
Supplement: Supplementary file 10 [file Lei_An_Efficient_Group_ACCV_2020_supplemental.zip › 0622-supp/accv2020submission.tex]

% Updated in February 2016 by Hwann-Tzong Chen
% Updated in May 2014 by Hideo Saito
% Updated in March 2012 by Yasuyuki Matsushita
% Updated in April 2002 by Antje Endemann, ...., and in March 2010 by Reinhard Klette
% Based on CVPR 07 and LNCS style, with modifications by DAF, AZ and elle 2008, AA 2010, ACCV 2010

\documentclass[runningheads]{llncs}
\usepackage{graphicx}
\usepackage{amsmath,amssymb} % define this before the line numbering.
%\usepackage{ruler}
\usepackage{color}
\usepackage{subfigure}
\usepackage{epstopdf}

%===========================================================
\begin{document}
\pagestyle{headings}
\mainmatter

\def\ACCV20SubNumber{622}  % Insert your submission number here

%===========================================================
%\title{Author Guidelines for ACCV Submission} % Replace with your title
\titlerunning{ACCV-20 submission ID \ACCV20SubNumber}
\authorrunning{ACCV-20 submission ID \ACCV20SubNumber}

\author{Anonymous ACCV 2020 submission}
\institute{Paper ID \ACCV20SubNumber}

%\maketitle

%===========================================================
%\begin{abstract}
%The abstract should summarize the contents of the paper and should
%contain at least 70 and at most 300 words. It should be set in 9-point
%font size and should be inset 1.0~cm from the right and left margins.
%\dots
%\end{abstract}

%===========================================================
\section{Supplementary Material}
The following items are contained in the supplementary material:
\begin{enumerate}
\item The comparison of GFFRN10-L with CARN when scaling factor is $\times 4$.
\item The comparison of GFFRN40 with the most state-of-the-art methods.
\item More qualitative results.
\end{enumerate}
%-------------------------------------------------------------------------
\subsection{GFFRN-L vs. CARN}
In our paper, GFFRN-L outperforms CARN under the scaling factors of $\times 2$ and $\times 3$. However, when the scaling factor becomes larger ($\times 4$), GFFRN-L does not have a similar advantage over CARN. For a fair comparison, we increase the number of GFFRB from 6 to 10 in order to make GFFRN-L have the same number of Multi-Adds with CARN. The comparison is shown in table~\ref{GFFRNL}. GFFRN-L outperforms outperforms CARN when scaling factor is $\times 4$.

%\begin{figure*}[h]
%\centerline{\includegraphics[width=11cm]{figs/CARN.eps}}
%\centering
%\caption{Performance comparison of GFFRN-L and CARN under different scaling factors.}
%\label{curveCARN}
%\end{figure*}

\begin{table}[h]
\centering
\caption{Quantitative comparisons of GFFRN10-L and CARN when scaling factor is $\times 4$. Red represents the best result.}
\label{GFFRNL}
\resizebox{12.5cm}{0.7cm}{
\begin{tabular}{clrrccccc}
\hline
Scale& Model&Params& Multi-Adds & Set5& Set14& B100& Urban100& Manga109\\
\hline
4&CARN&1.59M&91G&32.13/0.8937&28.60/0.7806& 27.58/0.7349 &26.07/0.7837&  -/-  \\
 &GFFRN10-L&1.53M&88G&\color{red}{32.18/0.8950}&\color{red}{28.64/0.7821}&\color{red}{27.60/0.7364}&\color{red}{26.12/0.7872}&\color{red}{30.50/0.9080}\\
\hline
\end{tabular}
}
\label{table:CARN}
\end{table}


\subsection{GFFRN40 vs. EDSR and RDN}
In our paper, we mainly focus on efficient and lightweight models. We designed a GFFRN (about 5M parameters) and a lightweight GFFRN-L (less than 1M parameters) to demonstrate the efficiency of the proposed GFFRB. Here we increase the number of GFFRB to further improve the performance of GFFRN. In this experiment, the number of the GFFRB $D$ is set to 40, channel expansion factor $e$ is set to 4, base channel number $m$ is set to 64 and we denote this model as GFFRN40. Note that all the GFFRBs in GFFRN40 are simply stacked like EDSR. In table~\ref{largemodel}, we compare our GFFRN with the most state-of-the-art methods EDSR and RDN. We can find that even with fewer parameters and computations, our GFFRN achieves a comparable result compared with the two methods. This fully demonstrates that the proposed GFFRB are more efficient than RB and RDB. Some visual results of these methods are shown in Figure~5-8.
\begin{table}
\begin{center}
\caption{Quantitative comparisons of state-of-the-art methods. Red represents the best result.}
\label{largemodel}
\resizebox{12.5cm}{2.1cm}{
\begin{tabular}{clrrccccc}
\hline
Scale& Model&Params& Multi-Adds & Set5& Set14& B100& Urban100& Manga109\\
\hline
 &EDSR&40.7M&9390G& 38.11/0.9601&33.92/0.9195&32.32/0.9013&\color{red}{32.93}/\color{black}{0.9351}&-\-\\
2&RDN&22.1M&5096G &\color{red}{38.24/0.9614}&34.01/\color{red}{0.9212}&\color{red}{32.34/0.9017}&32.89/0.9353&39.18/0.9780\\
 &GFFRN40&\color{red}{17.1M}&\color{red}{3940G}&38.19/0.9611&\color{red}{34.03}/\color{black}{0.9211}&\color{red}{32.34/0.9017}&32.92/\color{red}{0.9356}&\color{red}{39.21/0.9782}\\
\hline
 &EDSR&43.7M&4470G&34.65/0.9282&30.52/0.8462&29.25/0.8093&28.80/0.8653&-/-\\
3&RDN&22.3M&2285G &34.71/\color{red}{0.9296}&\color{red}{30.57/0.8468}&\color{red}{29.26}/\color{black}{0.8093}&28.80/0.8653&34.13/\color{red}{0.9484}\\
 &GFFRN40&\color{red}{17.3M}&\color{red}{1768G}&\color{red}{34.74/0.9296}&30.55/0.8467&29.25/\color{red}{0.8094}&\color{red}{28.81/0.8661}&\color{red}{34.14/0.9484}\\
\hline
 &EDSR& 43.1M&2900G&32.46/0.8968&28.80/\color{red}{0.7876}&27.71/\color{red}{0.7420}&\color{red}{26.64/0.8033}&-/-\\
4&RDN&22.6M&1301G&32.47/\color{red}{0.8990}&\color{red}{28.81}\color{black}{/0.7871}&\color{red}{27.72}\color{black}{/0.7419} &26.61/0.8028&31.00/0.9151\\
 &GFFRN40&\color{red}{17.2M}&\color{red}{1020G}&\color{red}{32.52}/\color{black}{0.8989}&28.79/0.7873&27.71/0.7414&26.60/0.8026&\color{red}{31.03/0.9157}\\
\hline
\end{tabular}
}
\end{center}
\end{table}
\subsection{More Qualitative Results}
In Figure~1-8, we provide more visual results of different methods.
\begin{figure}
  \centering
  \subfigure{
    \includegraphics[width=11cm]{figs/253027.eps}}
  \caption{Visual comparison of different methods on image "253027".}
  \label{253027} %% label for entire figure
\end{figure}

\begin{figure}
  \centering
  \subfigure{
    \includegraphics[width=11cm]{figs/UnbalanceTokyo.eps}}
  \caption{Visual comparison of different methods on image "UnbalanceTokyo".}
  \label{UnbalanceTokyo} %% label for entire figure
\end{figure}

\begin{figure}
  \centering
  \subfigure{
    \includegraphics[width=11cm]{figs/ARMS.eps}}
  \caption{Visual comparison of different methods on image "ARMS".}
  \label{ARMS} %% label for entire figure
\end{figure}

\begin{figure}
  \centering
  \subfigure{
    \includegraphics[width=11cm]{figs/Barbara.eps}}
  \caption{Visual comparison of different methods on image "Barbara".}
  \label{Barbara} %% label for entire figure
\end{figure}


\begin{figure}
  \centering
  \subfigure{
    \includegraphics[width=9cm]{figs/hamlet.eps}}
  \caption{Visual comparison of different methods on image "Hamlet".}
  \label{Barbara} %% label for entire figure
\end{figure}

\begin{figure}
  \centering
  \subfigure{
    \includegraphics[width=11cm]{figs/img004.eps}}
  \caption{Visual comparison of different methods on image "img004".}
  \label{Barbara} %% label for entire figure
\end{figure}

\begin{figure}
  \centering
  \subfigure{
    \includegraphics[width=11cm]{figs/img074.eps}}
  \caption{Visual comparison of different methods on image "img074".}
  \label{Barbara} %% label for entire figure
\end{figure}

\begin{figure}
  \centering
  \subfigure{
    \includegraphics[width=11cm]{figs/img092.eps}}
  \caption{Visual comparison of different methods on image "img092".}
  \label{Barbara} %% label for entire figure
\end{figure}

\end{document}
