# Supplementary material
Source: ML conference proceedings conference paper supplement (https://openaccess.thecvf.com/content/ACCV2020/html/Lei_An_Efficient_Group_ACCV_2020_paper.html)
Supplement: Supplementary file 10 [file Lei_An_Efficient_Group_ACCV_2020_supplemental.zip › 0622-supp/egbib.bib]

@misc{Authors20,
 author = {Authors},
 title = {The frobnicatable foo filter},
 note = {ACCV20 submission ID 512. Supplied as additional material {\tt accv20-512-frfofi.pdf}},
 year = 2020
}

@misc{Authors20b,
 author = {Authors},
 title = {Frobnication tutorial},
 note = {Supplied as additional material {\tt accv20-512-frtut.pdf}},
 year = 2020
}

@article{Alpher02,
author = {A. Alpher},
title = {Frobnication},
journal = {J. of Foo},
volume = 12, 
number = 1, 
pages = {234--778}, 
year = 2002
}

@article{Alpher03,
author = {A. Alpher and J.~P.~N. Fotheringham-Smythe},
title = {Frobnication revisited},
journal = {J. of Foo},
volume = 13, 
number = 1, 
pages = {234--778}, 
year = 2003
}

@article{Herman04,
author = {S. Herman and J.~P.~N. Fotheringham-Smythe and G. Gamow},
title = {Can a machine frobnicate?},
journal = {J. of Foo},
volume = 14, 
number = 1, 
pages = {234--778}, 
year = 2004
}
