# Supplementary material
Source: ML conference proceedings conference paper supplement (https://openaccess.thecvf.com/content/ACCV2020/html/Lei_An_Efficient_Group_ACCV_2020_paper.html)

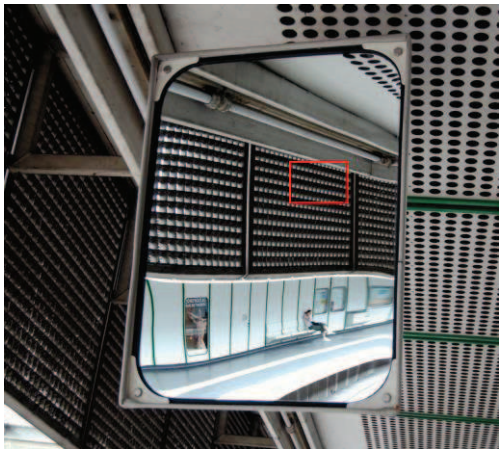

Urban100  
Img004 x4

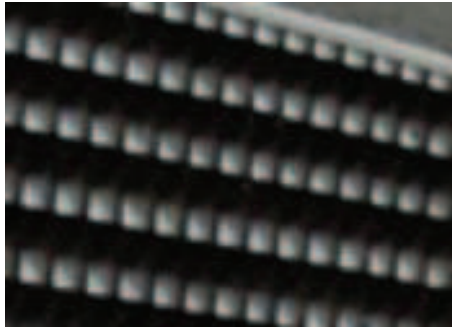

HR

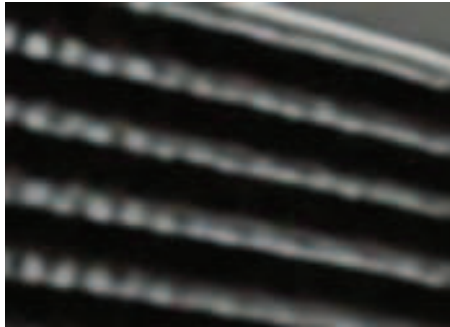

EDSR  
(24.08/0.8595)

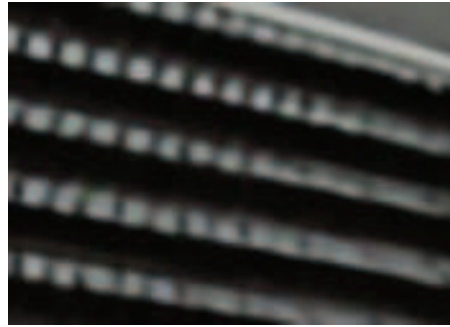

RDN  
(24.06/0.8534)

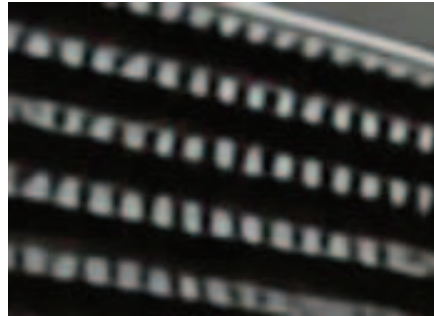

GFFRN40  
(24.15/0.8613)

Supplement: Supplementary file 1 [file Lei_An_Efficient_Group_ACCV_2020_supplemental.zip]

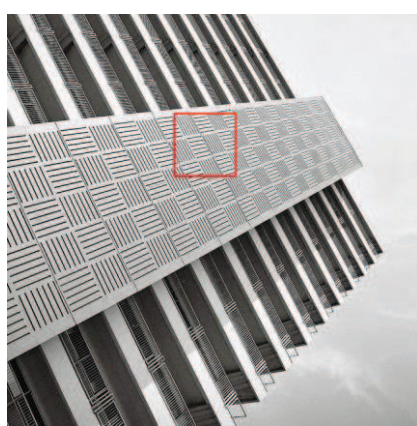

Urban100  
Img092 x3

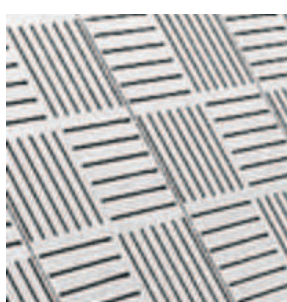

HR

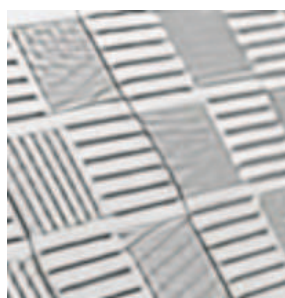

EDSR  
(21.08/0.7591)

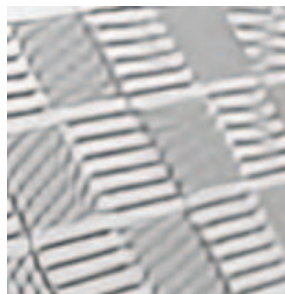

RDN  
(20.01/0.7169)

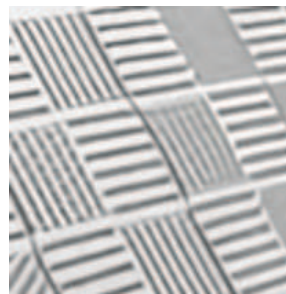

GFFRN40  
(20.87/0.7598)

Supplement: Supplementary file 3 [file Lei_An_Efficient_Group_ACCV_2020_supplemental.zip]

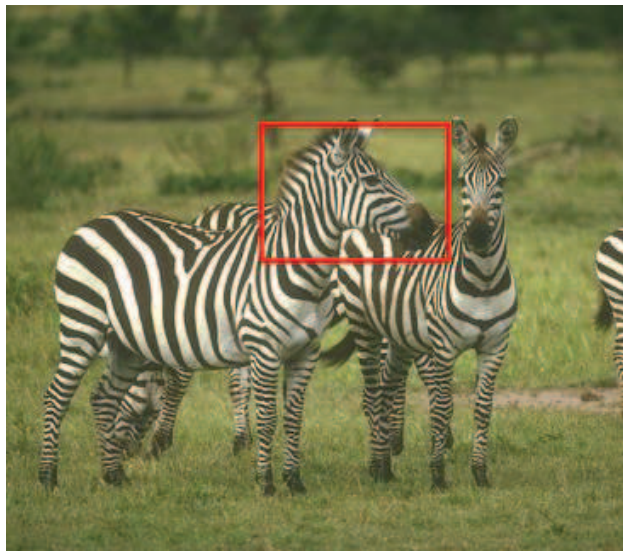

B100  
253027 x3

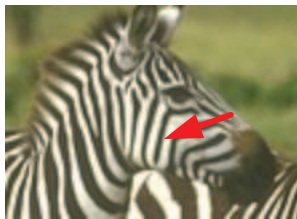

HR

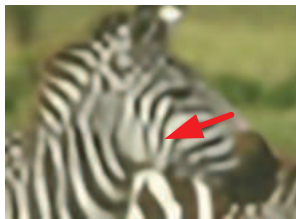

VDSR  
(23.82/0.7699)

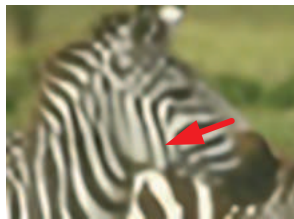

DRRN  
(23.70/0.7723)

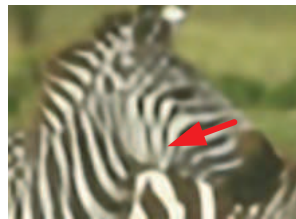

IDN  
(24.06/0.7765)

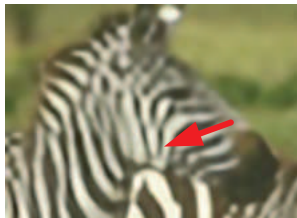

CARN  
(23.96/0.7778)

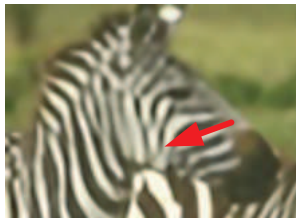

GFFRN-L  
(24.59/0.7853)

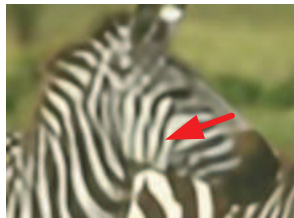

MSRN  
(24.63/0.7878)

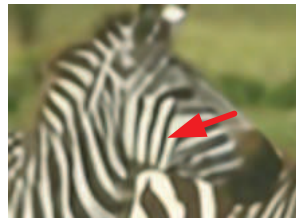

GFFRN  
(24.78/0.7902)

Supplement: Supplementary file 4 [file Lei_An_Efficient_Group_ACCV_2020_supplemental.zip]

DIV2K x2

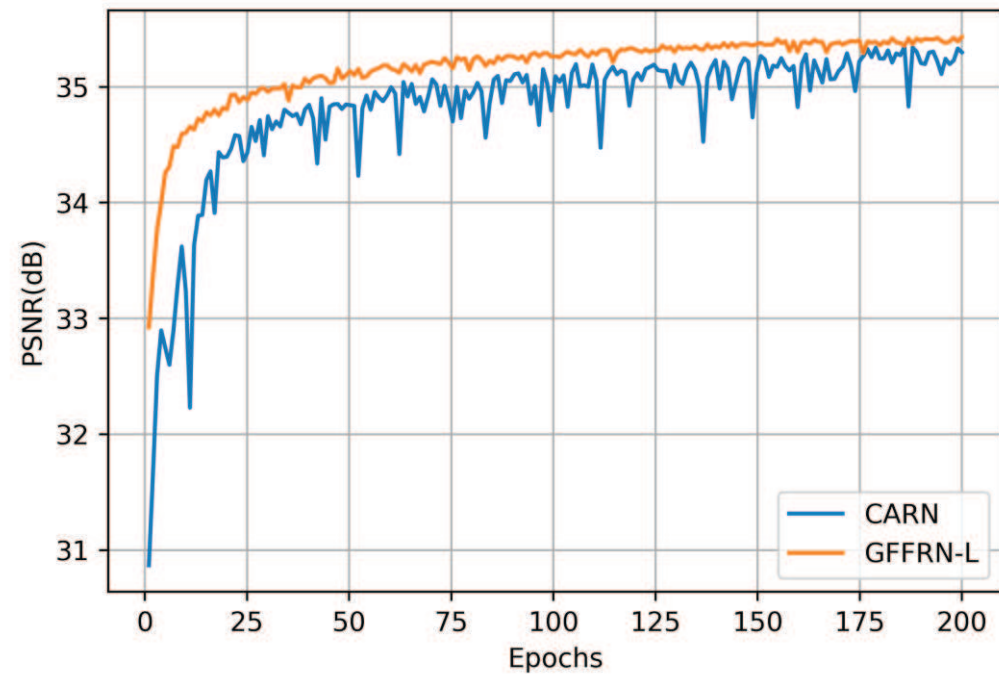

DIV2K x3

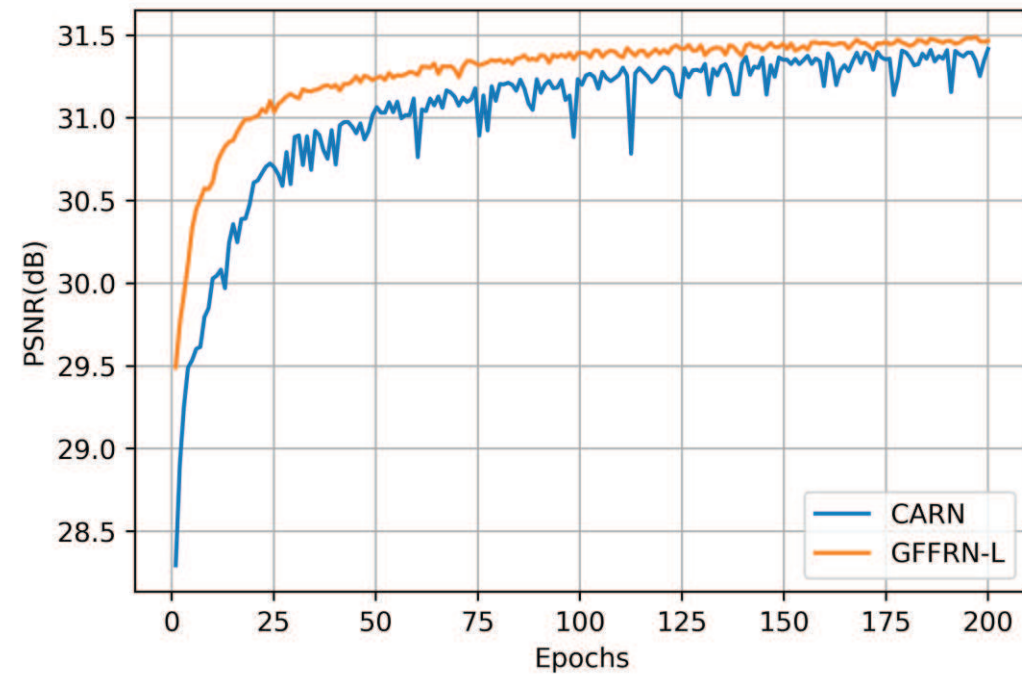

DIV2K x4

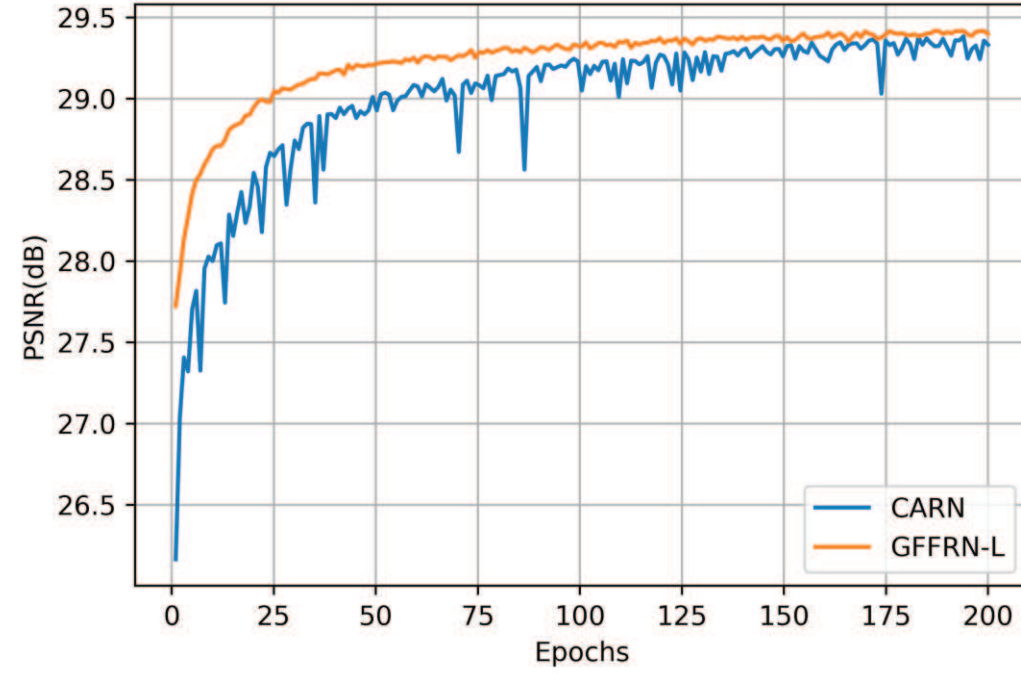

Supplement: Supplementary file 6 [file Lei_An_Efficient_Group_ACCV_2020_supplemental.zip]

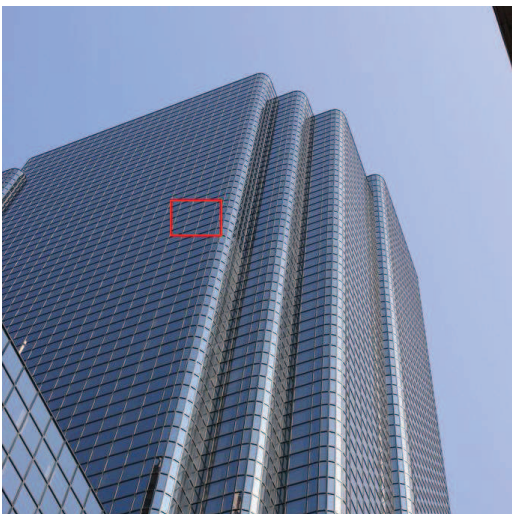

Urban100  
Img074 x4

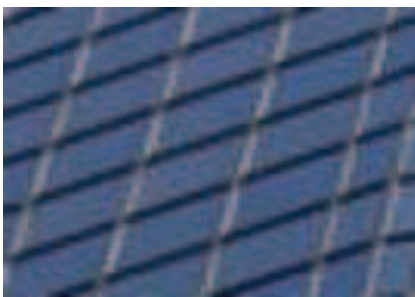

HR

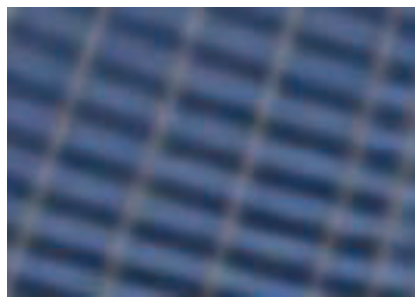

EDSR  
(24.21/0.7345)

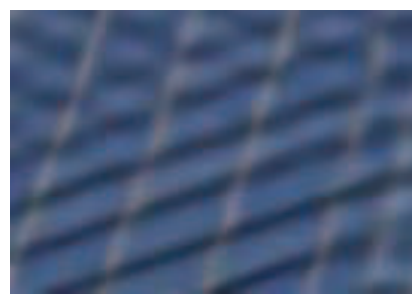

RDN  
(24.04/0.7286)

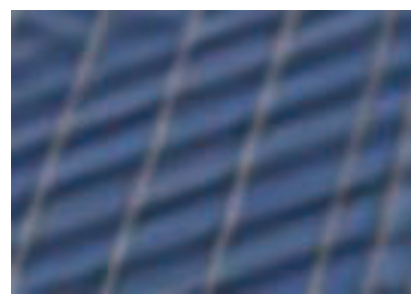

GFFRN40  
(24.30/0.7413)

Supplement: Supplementary file 7 [file Lei_An_Efficient_Group_ACCV_2020_supplemental.zip]

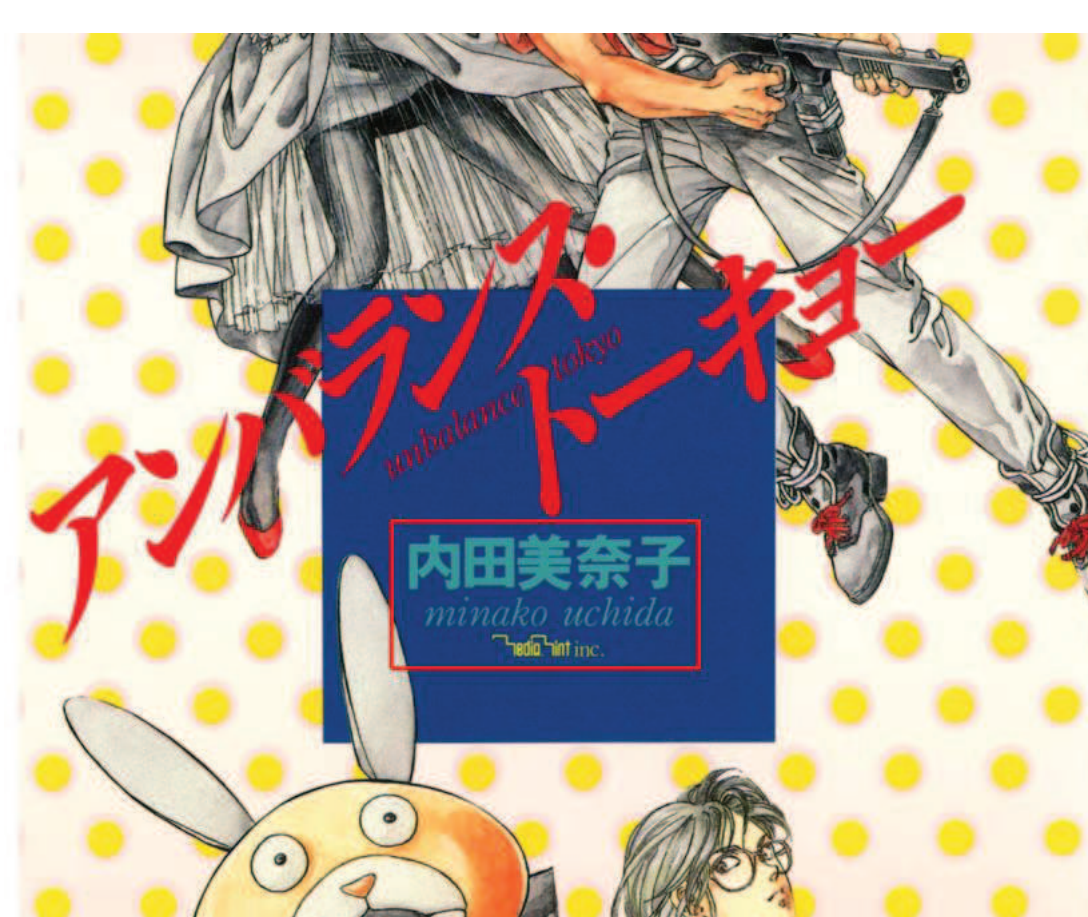

Manga109  
UnbalanceTokyo x4

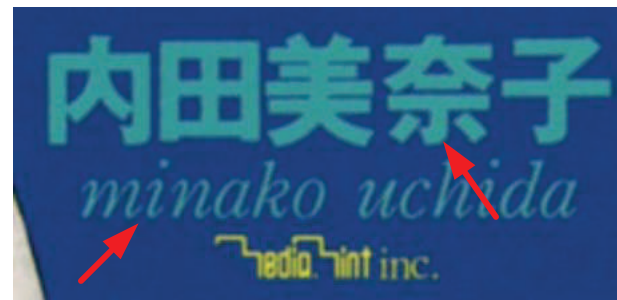

HR

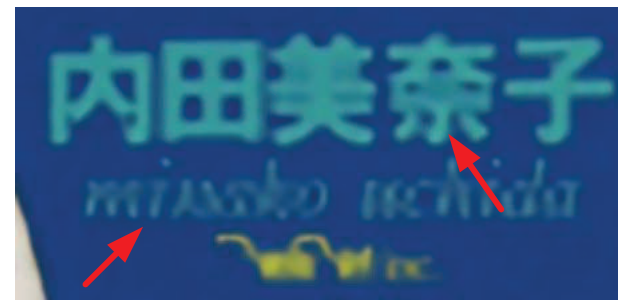

VDSR  
(26.29/0.8751)

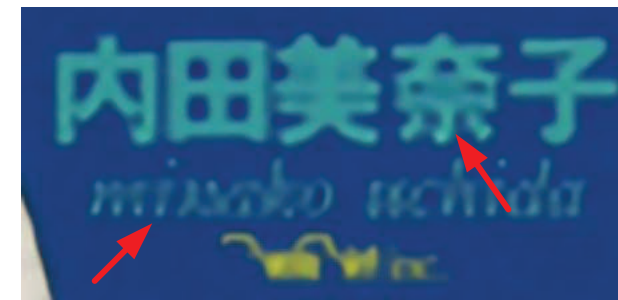

DRRN  
(26.47/0.8797)

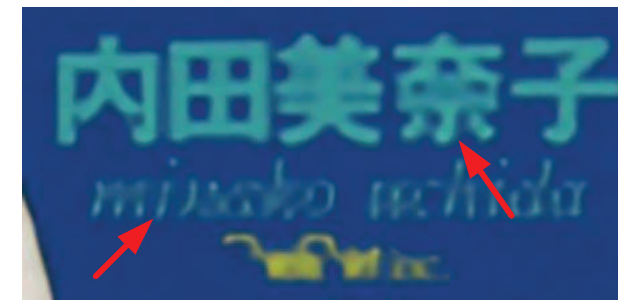

IDN  
(26.69/0.8851)

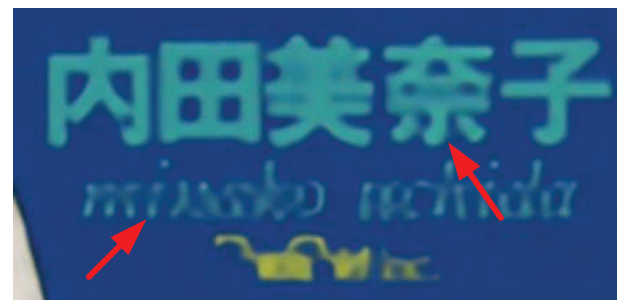

CARN  
(27.02/0.8944)

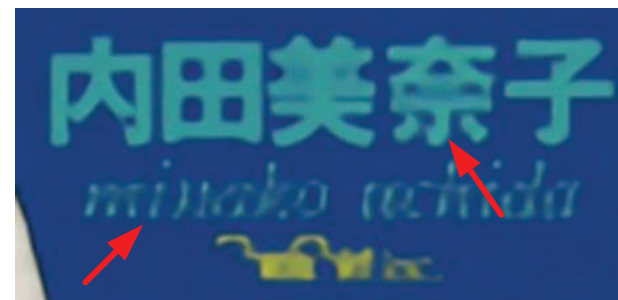

GFFRN-L  
(27.16/0.8972)

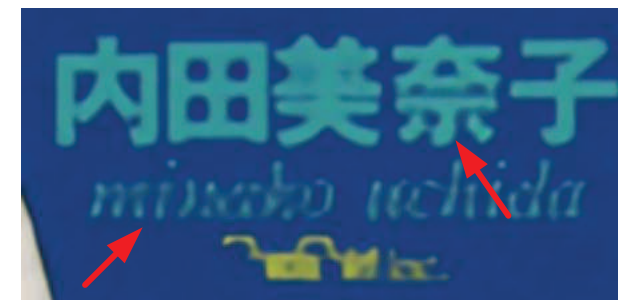

MSRN  
(27.36/0.9024)

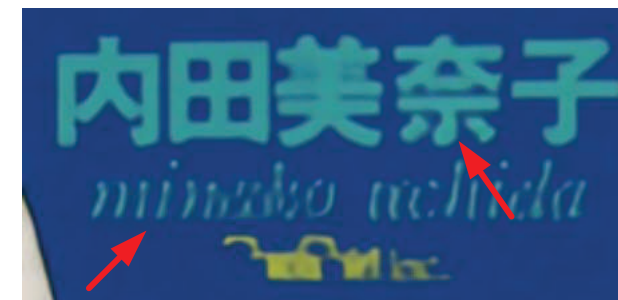

GFFRN  
(27.43/0.9047)

Supplement: Supplementary file 8 [file Lei_An_Efficient_Group_ACCV_2020_supplemental.zip]

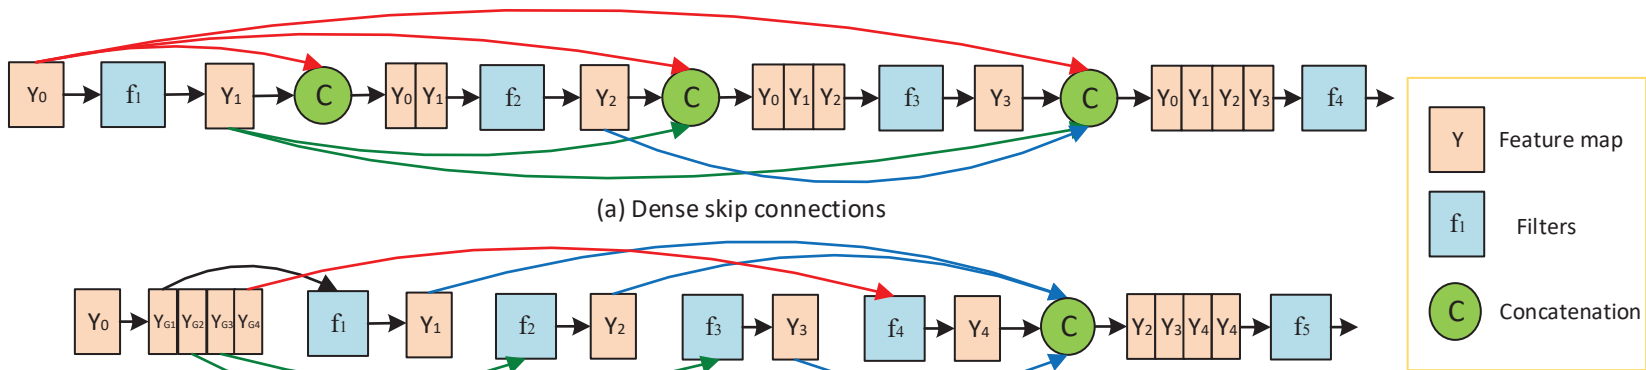

(a) Dense skip connections

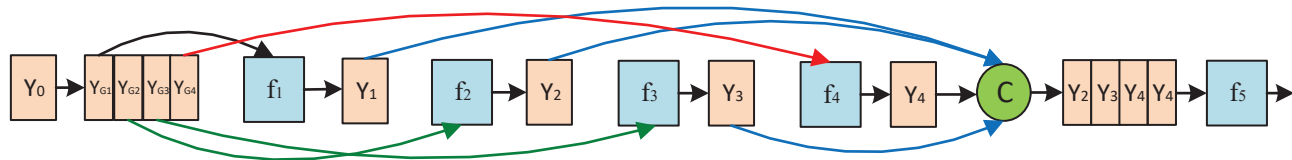

(b) Group convolution

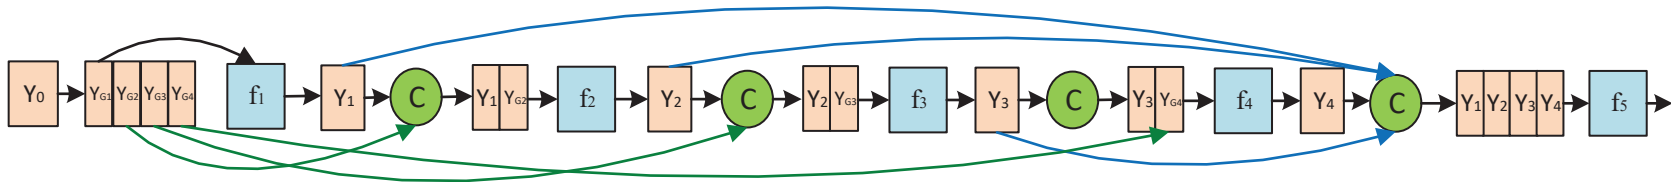

(c) Group convolution with skip connections

Supplement: Supplementary file 9 [file Lei_An_Efficient_Group_ACCV_2020_supplemental.zip]

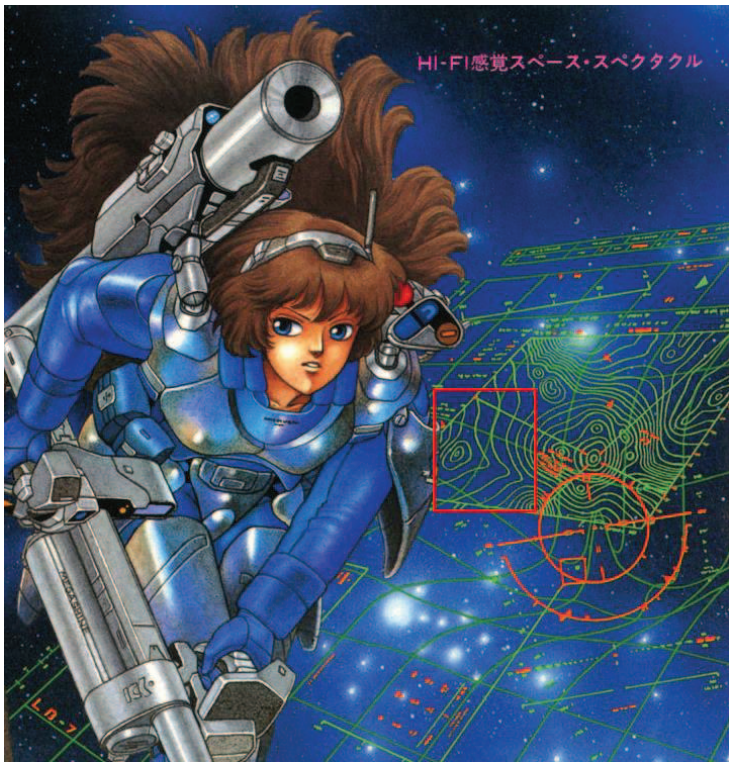

Manga109  
ARMS x4

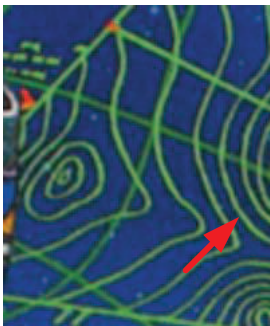

HR

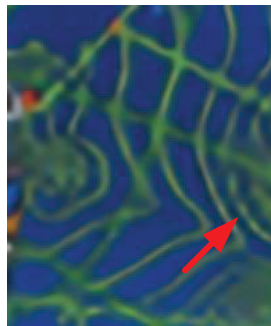

VDSR  
(27.33/0.7777)

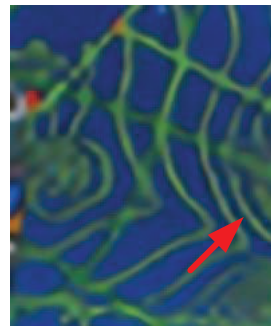

DRRN  
(27.53/0.7873)

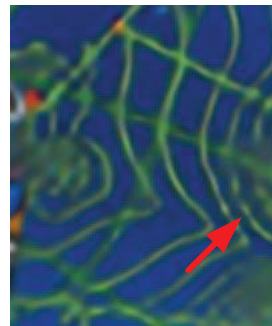

IDN  
(27.66/0.7924)

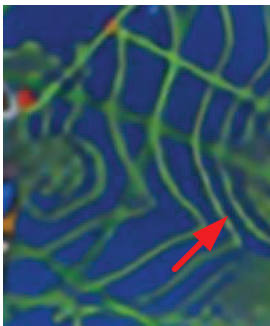

CARN  
(28.24/0.8134)

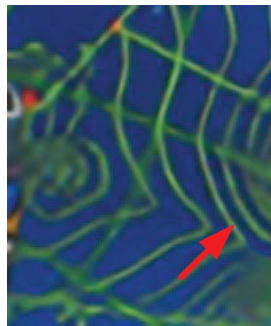

GFFRN-L  
(28.31/0.8132)

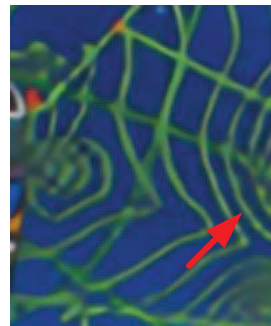

MSRN  
(28.54/0.8225)

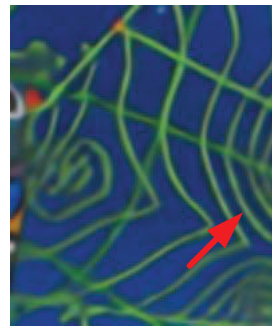

GFFRN  
(28.75/0.8280)

Supplement: Supplementary file 10 [file Lei_An_Efficient_Group_ACCV_2020_supplemental.zip › 0622-supp/figs/ARMS-eps-converted-to.pdf]

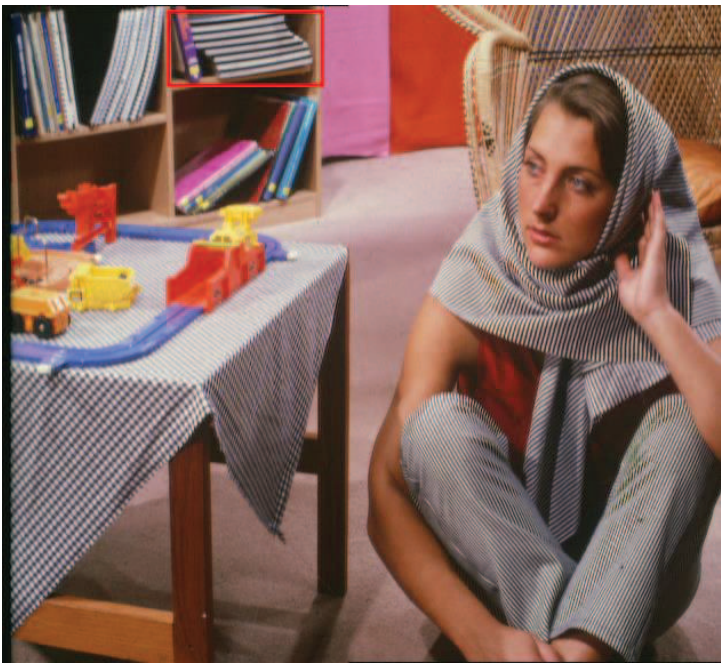

Set14  
Barbara x4

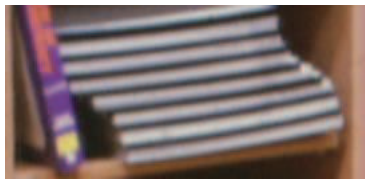

HR

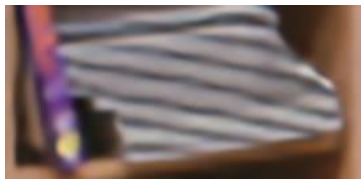

VDSR  
(25.78/0.7383)

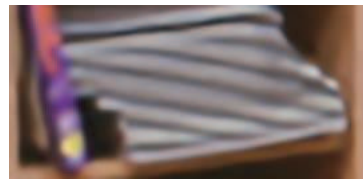

DRRN  
(25.91/0.7423)

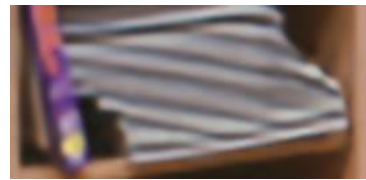

IDN  
(25.95/0.7444)

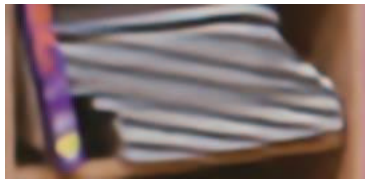

CARN  
(25.84/0.7452)

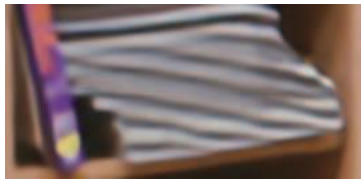

GFFRN-L  
(25.92/0.7497)

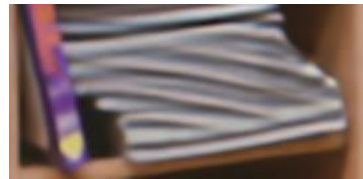

MSRN  
(26.03/0.7533)

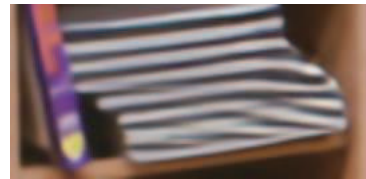

GFFRN  
(26.05/0.7572)

Supplement: Supplementary file 10 [file Lei_An_Efficient_Group_ACCV_2020_supplemental.zip › 0622-supp/figs/Barbara-eps-converted-to.pdf]
